# Supplementary material for: The COMiT’ID Study: Developing Core Outcome Domains Sets for Clinical Trials of Sound-, Psychology-, and Pharmacology-Based Interventions for Chronic Subjective Tinnitus in Adults
Source: Trends Hear. 2018 Nov 29;22:2331216518814384. doi: 10.1177/2331216518814384 (PMC6277759; doi:10.1177/2331216518814384)
Supplement: Supplemental Material3 - Supplemental material for The COMiT’ID Study: Developing Core Outcome Domains Sets for Clinical Trials of Sound-, Psychology-, and Pharmacology-Based Interventions for Chronic Subjective Tinnitus in Adults [file Supplemental_Material3.pdf]

**Supplementary file 3.** Comments in favour and against, explaining the reasons for setting aside those outcome domains which failed to reach the 70% consensus in the face-to-face meeting for sound-based interventions. Votes represent the % of the 19 participants who agreed that these outcome domains were not critical to be measured in every clinical trial for sound-based tinnitus interventions (threshold  $\geq 30\%$ ). \*Note that participants voted to replace 'helplessness' by the concept 'sense of control' during this face-to-face meeting.

| Sound-based exclusions | Vote | Comments in favour                                                                                                                                                                                                                                                                        | Comments against                                                                                                                                                                                                                                                                                                                                                                                                   |
|------------------------|------|-------------------------------------------------------------------------------------------------------------------------------------------------------------------------------------------------------------------------------------------------------------------------------------------|--------------------------------------------------------------------------------------------------------------------------------------------------------------------------------------------------------------------------------------------------------------------------------------------------------------------------------------------------------------------------------------------------------------------|
| Ability to relax       | 95   | <i>No strong views expressed.</i>                                                                                                                                                                                                                                                         | Some felt this was covered by sleep outcome domains.                                                                                                                                                                                                                                                                                                                                                               |
| Acceptance of tinnitus | 89   | <i>No strong views expressed.</i>                                                                                                                                                                                                                                                         | <ul style="list-style-type: none"> <li>Some perceived this as a 'passive' outcome that does not reflect a reduction in the tinnitus symptoms.</li> <li>One participant mentioned she was never going to 'accept' her tinnitus, but that did not mean she could not cope with it.</li> <li>Sense of control was felt to cover elements of acceptance.</li> </ul>                                                    |
| Annoyance              | 89   | <i>No strong views expressed.</i>                                                                                                                                                                                                                                                         | <ul style="list-style-type: none"> <li>For some, 'annoyance' is associated with to 'ability to ignore' since if one can successfully ignore tinnitus, then it is not so annoying.</li> <li>One participant felt 'annoyance' trivialised the impact of tinnitus.</li> </ul>                                                                                                                                         |
| Anxiety                | 89   | <ul style="list-style-type: none"> <li>Some felt that it is important for the COS to cover the emotional impact of tinnitus</li> </ul>                                                                                                                                                    | <ul style="list-style-type: none"> <li>As with 'depressive symptoms', could be related to other domains e.g. 'coping', 'sense of control', 'treatment satisfaction' and 'intrusiveness'.</li> <li>Some felt this domain was too niche/ clinically focussed and therefore not relevant to all people with tinnitus.</li> <li>Some felt this symptom could not be changed directly through sound therapy.</li> </ul> |
| Conversations          | 89   | <ul style="list-style-type: none"> <li>Important to measure tinnitus impact on hearing ability.</li> <li>One subgroup wanted 'tinnitus intrusiveness' to encompass aspects of holding a conversation.</li> <li>One participant argued that this was a prominent issue for him.</li> </ul> | <ul style="list-style-type: none"> <li>Not a prominent issue for all patients.</li> <li>Difficult to differentiate from outcomes related to hearing loss.</li> <li>Could be covered by intrusiveness.</li> </ul>                                                                                                                                                                                                   |
| Coping                 | 47   | Measuring coping could indicate the patient's progress (e.g. high levels of coping techniques required in early                                                                                                                                                                           | <ul style="list-style-type: none"> <li>Could be covered by aspects of 'sense of control'.</li> <li>Confusion about how coping 'techniques' are relevant to a sound-based treatment. It was felt that the 'technique' would be the action</li> </ul>                                                                                                                                                                |

|                                              |     |                                                                                                                                                                                                                                     |                                                                                                                                                                                                                                                                                                                                                                                                                                                                                                                                                            |
|----------------------------------------------|-----|-------------------------------------------------------------------------------------------------------------------------------------------------------------------------------------------------------------------------------------|------------------------------------------------------------------------------------------------------------------------------------------------------------------------------------------------------------------------------------------------------------------------------------------------------------------------------------------------------------------------------------------------------------------------------------------------------------------------------------------------------------------------------------------------------------|
|                                              |     | stages vs. fewer coping techniques needed as the patient progresses).                                                                                                                                                               | <p>of using the sound and, in this context, to measure this would not make sense.</p> <ul style="list-style-type: none"> <li>• The group agreed that sound-based treatments do not always directly employ 'techniques'.</li> <li>• Overlap with 'ability to ignore' and 'concentration'.</li> </ul>                                                                                                                                                                                                                                                        |
| Depressive symptoms                          | 89  | <ul style="list-style-type: none"> <li>• Some felt that it is important for the COS to cover the emotional impact of tinnitus.</li> <li>• One participant argued that sound treatment can alleviate depressive symptoms.</li> </ul> | <ul style="list-style-type: none"> <li>• As with 'anxiety, could be covered by other domains e.g. 'coping', 'sense of control', 'treatment satisfaction' and 'intrusiveness'</li> <li>• Some felt this domain was too niche/ clinically focussed and therefore not relevant to all.</li> <li>• Some felt this symptom could not be changed with sound therapy.</li> </ul>                                                                                                                                                                                  |
| Difficulties getting to sleep                | 89  | The group acknowledged that this is a critical complaint, but not for all people with tinnitus.                                                                                                                                     | <ul style="list-style-type: none"> <li>• One subgroup felt that 'quality of sleep' was more important than 'getting to sleep' – a more holistic measure of sleep problems.</li> <li>• One subgroup felt that difficulties was covered by quality of sleep. Argued that it is about the right amount of sleep rather than difficulties per se.</li> <li>• Difficulties getting to sleep can also be caused by other health conditions, not related to the tinnitus.</li> <li>• Not every person with tinnitus has difficulties getting to sleep.</li> </ul> |
| Frequency of occurrence of tinnitus episodes | 95  | One participant argued that this is an indicator of tinnitus perception and source. Treatments may perform differently depending on this.                                                                                           | <ul style="list-style-type: none"> <li>• Many others argued the type of tinnitus is not relevant to measuring the effect of a treatment.</li> <li>• This domain could inform subgrouping of participants within a study but it is not seen as a meaningful outcome.</li> </ul>                                                                                                                                                                                                                                                                             |
| *Helplessness (lack of control)              | 100 | <i>No strong views expressed.</i>                                                                                                                                                                                                   | One subgroup placed 'helplessness' in their top 6, but there was a concern that 'helplessness' is concerned with deep suffering which is relevant only to some people with tinnitus.                                                                                                                                                                                                                                                                                                                                                                       |
| Impact on individual activities              | 95  | <i>No strong views expressed.</i>                                                                                                                                                                                                   | Could be covered by 'coping' or 'tinnitus intrusiveness'.                                                                                                                                                                                                                                                                                                                                                                                                                                                                                                  |
| Impact on social life                        | 95  | <i>No strong views expressed.</i>                                                                                                                                                                                                   | Could be covered by 'coping' or 'tinnitus intrusiveness'.                                                                                                                                                                                                                                                                                                                                                                                                                                                                                                  |
| Impact on work                               | 95  | <i>No strong views expressed.</i>                                                                                                                                                                                                   | Could be covered by 'coping' or 'tinnitus intrusiveness'.                                                                                                                                                                                                                                                                                                                                                                                                                                                                                                  |

|                         |     |                                                                                                                                                                                                                                                                                                                                                      |                                                                                                                                                                                                                                                                                                                                                                                                                                                                                                                               |
|-------------------------|-----|------------------------------------------------------------------------------------------------------------------------------------------------------------------------------------------------------------------------------------------------------------------------------------------------------------------------------------------------------|-------------------------------------------------------------------------------------------------------------------------------------------------------------------------------------------------------------------------------------------------------------------------------------------------------------------------------------------------------------------------------------------------------------------------------------------------------------------------------------------------------------------------------|
| Listening               | 89  | <ul style="list-style-type: none"> <li>• Important to measure tinnitus impact on hearing ability.</li> <li>• One subgroup wanted 'tinnitus intrusiveness' to encompass aspects of listening.</li> </ul>                                                                                                                                              | <ul style="list-style-type: none"> <li>• Not a prominent issue for all people with tinnitus.</li> <li>• Difficult to differentiate from outcomes related to hearing loss.</li> <li>• Could be covered by 'tinnitus intrusiveness'.</li> </ul>                                                                                                                                                                                                                                                                                 |
| Tinnitus awareness      | 100 | <ul style="list-style-type: none"> <li>• Sensitive outcome to sound-based therapy.</li> </ul>                                                                                                                                                                                                                                                        | <ul style="list-style-type: none"> <li>• Seen as the 'root domain' of tinnitus intrusiveness and other domains (e.g. a reduction in awareness would mean reduced intrusiveness) and so could be covered by 'tinnitus intrusiveness'.</li> <li>• Does not capture the emotional impact/distress that tinnitus causes.</li> <li>• For some, this was simply considered a 'baseline' state that does not necessarily call for treatment.</li> <li>• 'Tinnitus intrusiveness' is potentially more sensitive to change.</li> </ul> |
| Tinnitus unpleasantness | 95  | <i>No strong views expressed.</i>                                                                                                                                                                                                                                                                                                                    | Not as important as 'tinnitus intrusiveness'.                                                                                                                                                                                                                                                                                                                                                                                                                                                                                 |
| Treatment satisfaction  | 68  | <ul style="list-style-type: none"> <li>• This outcome was considered sufficiently broad to cover a range of therapeutic devices.</li> <li>• It is important for people with tinnitus to be satisfied with the device they are prescribed in order for them to be motivated to use it (potentially an indicator for adherence/compliance).</li> </ul> | <ul style="list-style-type: none"> <li>• May be coloured by factors not related to the treatment, such as a grumpy clinician etc. Moreover, 'treatment satisfaction' was felt not so suitable for early evaluation of a novel therapy (i.e. a clinical trial) because it measures satisfaction with the overall therapeutic process, not the sound device per se.</li> <li>• Satisfaction could be achieved without effectiveness.</li> <li>• Satisfaction is something to measure later down the line.</li> </ul>            |
