# Supplementary material for: The COMiT’ID Study: Developing Core Outcome Domains Sets for Clinical Trials of Sound-, Psychology-, and Pharmacology-Based Interventions for Chronic Subjective Tinnitus in Adults
Source: Trends Hear. 2018 Nov 29;22:2331216518814384. doi: 10.1177/2331216518814384 (PMC6277759; doi:10.1177/2331216518814384)
Supplement: Supplemental Material5 - Supplemental material for The COMiT’ID Study: Developing Core Outcome Domains Sets for Clinical Trials of Sound-, Psychology-, and Pharmacology-Based Interventions for Chronic Subjective Tinnitus in Adults [file Supplemental_Material5.pdf]

**Supplementary file 5.** Comments in favour and against, explaining the reasons for setting aside those outcome domains which failed to reach the 70% consensus in the face-to-face meeting for pharmacology-based interventions. Votes represent the % of the 16 participants who agreed that these outcome domains were *not* critical to be measured in every clinical trial for pharmacology-based tinnitus treatments (threshold  $\geq 30\%$ ). \*Note that participants voted to replace ‘anxiety’ and ‘depressive symptoms’ by the concept ‘mood’ during this face-to-face meeting.

| Pharmacology-based exclusions | Vote | Comments in favour                                                                                                                                                                                   | Comments against                                                                                                                                                                                                                                                                                                                                                                                             |
|-------------------------------|------|------------------------------------------------------------------------------------------------------------------------------------------------------------------------------------------------------|--------------------------------------------------------------------------------------------------------------------------------------------------------------------------------------------------------------------------------------------------------------------------------------------------------------------------------------------------------------------------------------------------------------|
| Ability to ignore             | 88   | <i>No strong views expressed.</i>                                                                                                                                                                    | <ul style="list-style-type: none"> <li>• ‘Ability to ignore’ was considered much less ambitious than ‘Intrusiveness’. ‘Ability to ignore’ merely suggests helping people to manage, ‘intrusiveness’ suggests seeking a cure.</li> <li>• The concept could be interpreted differently by different people.</li> </ul>                                                                                         |
| Adverse reaction              | 100  | Agreed important to always measure for drug trials.                                                                                                                                                  | Adverse events are already a necessity by the regulatory authorities for any properly conducted double-blinded randomised controlled pharmacological trial, and so on that basis the group felt that it was pointless to include as a COS.                                                                                                                                                                   |
| Annoyance                     | 88   | <ul style="list-style-type: none"> <li>• Concept of annoyance can be easily explained and interpreted.</li> <li>• Can have an impact on a variety of activities (e.g. social interaction)</li> </ul> | <ul style="list-style-type: none"> <li>• Some considered this too ‘mild’ or ‘trivial’.</li> <li>• The group felt ‘annoyance’ could be covered by other domains (e.g. ‘intrusiveness’).</li> <li>• Some believed it to be too subjective and personality-dependent.</li> </ul>                                                                                                                                |
| *Anxiety                      | 88   | People with tinnitus are often in a state of anxiety, which is separate from depressive symptoms, but may be related.                                                                                | <ul style="list-style-type: none"> <li>• ‘Anxiety’ is a secondary consequence of tinnitus.</li> <li>• It can be treated by anxiolytics, not a direct target for tinnitus drugs.</li> <li>• Both anxiety and depressive symptoms could be captured together as feelings related to mood. The definition of ‘mood’ indicates a sense of well-being rather than having a psychiatric classification.</li> </ul> |
| Concentration                 | 88   | <i>No strong views expressed.</i>                                                                                                                                                                    | <ul style="list-style-type: none"> <li>• Concentration problems are not specific to tinnitus.</li> <li>• Some felt this was covered adequately by ‘tinnitus intrusiveness’.</li> </ul>                                                                                                                                                                                                                       |
| Confusion                     | 100  | <i>No strong views expressed.</i>                                                                                                                                                                    | Too general, may not necessarily be specific to tinnitus.                                                                                                                                                                                                                                                                                                                                                    |
| Coping                        | 88   | <i>No strong views expressed.</i>                                                                                                                                                                    | <ul style="list-style-type: none"> <li>• Coping techniques felt to be less relevant to pharmaceutical interventions.</li> </ul>                                                                                                                                                                                                                                                                              |

|                                                     |     |                                                                                                                                                                                                                                                                                                                                                                 |                                                                                                                                                                                                                                                                                                                                                                                                                                     |
|-----------------------------------------------------|-----|-----------------------------------------------------------------------------------------------------------------------------------------------------------------------------------------------------------------------------------------------------------------------------------------------------------------------------------------------------------------|-------------------------------------------------------------------------------------------------------------------------------------------------------------------------------------------------------------------------------------------------------------------------------------------------------------------------------------------------------------------------------------------------------------------------------------|
| *Depressive symptoms                                | 88  | People with tinnitus often experience depressive symptoms, which is separate from anxiety, but may be related                                                                                                                                                                                                                                                   | <ul style="list-style-type: none"> <li>• ‘Depressive symptoms’ are a secondary consequence of tinnitus.</li> <li>• It can be treated with antidepressants, not a direct target for tinnitus drugs.</li> <li>• Both ‘depressive symptoms’ and ‘anxiety’ could be captured together as feelings related to mood, since they are more about having a sense of well-being than having a psychiatric classification.</li> </ul>          |
| Difficulties getting to sleep                       | 100 | <i>No strong views expressed.</i>                                                                                                                                                                                                                                                                                                                               | <ul style="list-style-type: none"> <li>• Difficulties getting to sleep can be part of a hierarchy of sleep problems that is better captured by ‘quality of sleep’. Quality of sleep is more encompassing.</li> <li>• Not all people with tinnitus have problems with sleep and a good core outcome will be relevant to everyone.</li> </ul>                                                                                         |
| Impact on individual activities                     | 31  | <ul style="list-style-type: none"> <li>• Recognises the World Health Organisation ICF framework (i.e. activity limitations) and is an indicator of well-being.</li> <li>• May be less influenced by personality type (introvert vs extrovert).</li> <li>• Some felt it could be sensitive to change in the short term (i.e. during a clinical trial)</li> </ul> | <i>No strong views expressed.</i>                                                                                                                                                                                                                                                                                                                                                                                                   |
| Impact on social life                               | 88  | Recognises the World Health Organisation ICF framework (i.e. social participation) and is an indicator of well-being.                                                                                                                                                                                                                                           | <ul style="list-style-type: none"> <li>• Tinnitus interventions can only partly influence this outcome. It may be more to do with the number of social interactions the individual has.</li> <li>• May be influenced by extrovert more than introvert personality type.</li> <li>• Some doubted that people with tinnitus could show a change on this parameter over a short time period (i.e. during a clinical trial).</li> </ul> |
| Impact on work                                      | 88  | <i>No strong views expressed.</i>                                                                                                                                                                                                                                                                                                                               | Not applicable to those who are in education, retired, or otherwise not working                                                                                                                                                                                                                                                                                                                                                     |
| Mood (replaced ‘anxiety’ and ‘depressive symptoms’) | 75  | <ul style="list-style-type: none"> <li>• The group noted that regulatory bodies typically seek evidence of quality of life benefit in clinical trials, so ‘mood’ could be an indicator of therapeutic benefit.</li> </ul>                                                                                                                                       | <ul style="list-style-type: none"> <li>• The definition of ‘mood’ is too unspecific.</li> <li>• The impact of ‘mood’ on quality of life can be captured by ‘intrusiveness’.</li> <li>• ‘Mood’ is a secondary consequence of tinnitus. It implies emotional issues that may not be specific to the tinnitus.</li> </ul>                                                                                                              |

|                         |     |                                                                                                                                                                                                                                                                                                                                                                                                                                   |                                                                                                                                                                                                                                                                                                                                                                                                                                                                                 |
|-------------------------|-----|-----------------------------------------------------------------------------------------------------------------------------------------------------------------------------------------------------------------------------------------------------------------------------------------------------------------------------------------------------------------------------------------------------------------------------------|---------------------------------------------------------------------------------------------------------------------------------------------------------------------------------------------------------------------------------------------------------------------------------------------------------------------------------------------------------------------------------------------------------------------------------------------------------------------------------|
|                         |     |                                                                                                                                                                                                                                                                                                                                                                                                                                   | <ul style="list-style-type: none"> <li>• It can be treated with other drugs, not a direct target for tinnitus drugs.</li> <li>• Could be more useful as a stratification tool when interpreting data from clinical trials.</li> </ul>                                                                                                                                                                                                                                           |
| Quality of sleep        | 62  | <ul style="list-style-type: none"> <li>• 'Quality of sleep' captures all different aspects of tinnitus-related sleep complaints.</li> <li>• Disruption of sleep quality is described as a major complaint associated with tinnitus.</li> <li>• Some suggested that poor sleep quality could directly modulate tinnitus intrusiveness and loudness so it is therefore important to understand changes in these aspects.</li> </ul> | <ul style="list-style-type: none"> <li>• Not all people with tinnitus have problems with sleep and a good core outcome will be relevant to everyone.</li> <li>• The group felt that inclusion of 'quality of sleep' in the COS may weaken the power of the trial because it is not common to all people with tinnitus.</li> </ul>                                                                                                                                               |
| Tinnitus unpleasantness | 100 | <i>No strong views expressed.</i>                                                                                                                                                                                                                                                                                                                                                                                                 | <ul style="list-style-type: none"> <li>• The group had doubts that a drug therapy could change the degree of 'pleasantness' (i.e. believed unlikely to change tinnitus quality or pitch).</li> <li>• There were mixed feelings about 'unpleasantness' since what is deemed to be unpleasant is quite individual and may be more driven by personality.</li> <li>• Individual interpretations of the construct could make it hard to come up with a reliable measure.</li> </ul> |
| Treatment satisfaction  | 88  | <i>No strong views expressed.</i>                                                                                                                                                                                                                                                                                                                                                                                                 | This is not specific to the tinnitus.                                                                                                                                                                                                                                                                                                                                                                                                                                           |
