# Supplementary material for: The COMiT’ID Study: Developing Core Outcome Domains Sets for Clinical Trials of Sound-, Psychology-, and Pharmacology-Based Interventions for Chronic Subjective Tinnitus in Adults
Source: PubMed Central journal article supplement (PMC6277759; doi:10.1177/2331216518814384), 2018-11-29
Supplement: Supplemental_Material4.pdf [file Supplemental_Material4.pdf]

**Supplementary file 4.** Comments in favour and against, explaining the reasons for setting aside those outcome domains which failed to reach the 70% consensus in the face-to-face meeting for psychology-based interventions. Votes represent the % of the 19 participants who agreed that these outcome domains were not critical to be measured in every clinical trial for psychology-based tinnitus interventions (threshold  $\geq 30\%$ ).

| Psychology-based exclusions | Vote | Comments in favour                                                                                                                                                                 | Comments against                                                                                                                                                                                                                                                                                                                                |
|-----------------------------|------|------------------------------------------------------------------------------------------------------------------------------------------------------------------------------------|-------------------------------------------------------------------------------------------------------------------------------------------------------------------------------------------------------------------------------------------------------------------------------------------------------------------------------------------------|
| Ability to ignore           | 95   | <i>No strong views expressed.</i>                                                                                                                                                  | <ul style="list-style-type: none"> <li>• Some patients are able to cope with their tinnitus without trying to ignore it.</li> <li>• Some psychological treatments specifically aim not to ignore the tinnitus.</li> <li>• Could be covered by 'tinnitus intrusiveness'.</li> </ul>                                                              |
| Annoyance                   | 74   | <i>No strong views expressed.</i>                                                                                                                                                  | <i>No strong views expressed.</i>                                                                                                                                                                                                                                                                                                               |
| Anxiety                     | 95   | <ul style="list-style-type: none"> <li>• Identified as a major focus for psychology-based treatments.</li> <li>• When a person is anxious, it has a big impact on life.</li> </ul> | <ul style="list-style-type: none"> <li>• If 'anxiety' means a clinically meaningful anxiety disorder, then this definition applies to a very limited number of people with tinnitus.</li> <li>• The more everyday experience of anxiety could be captured by the outcome domain 'mood'.</li> </ul>                                              |
| Catastrophising             | 74   | <i>No strong views expressed.</i>                                                                                                                                                  | <i>No strong views expressed.</i>                                                                                                                                                                                                                                                                                                               |
| Concentration               | 89   | <i>No strong views expressed.</i>                                                                                                                                                  | <ul style="list-style-type: none"> <li>• The group noted that there might be other reasons for lack of concentration other than tinnitus.</li> <li>• One subgroup argued this might not be very sensitive to the effects of a psychological intervention.</li> <li>• Some considered this to be similar to 'tinnitus intrusiveness'.</li> </ul> |
| Coping                      | 37   | <i>No strong views expressed.</i>                                                                                                                                                  | Improving on a coping scale (as in using different coping strategies) does not always mean that the person is improving.                                                                                                                                                                                                                        |
| Depressive symptoms         | 95   | When a patient is depressed, it has a big impact on life.                                                                                                                          | <ul style="list-style-type: none"> <li>• If 'depressive symptoms' means a clinically meaningful depression disorder, then this definition applies to a very limited number of people with tinnitus.</li> <li>• The more everyday experience of depression could be captured by the outcome domain 'mood'.</li> </ul>                            |

|                                 |    |                                                                                                                                                                                                                                                                                 |                                                                                                                                                                                                                                                      |
|---------------------------------|----|---------------------------------------------------------------------------------------------------------------------------------------------------------------------------------------------------------------------------------------------------------------------------------|------------------------------------------------------------------------------------------------------------------------------------------------------------------------------------------------------------------------------------------------------|
| Difficulties getting to sleep   | 69 | <ul style="list-style-type: none"> <li>• The group identified that this is often a major focus for psychology-based intervention.</li> <li>• One participant mentioned that sleep is fundamental to general health.</li> </ul>                                                  | <ul style="list-style-type: none"> <li>• The group noted that not everyone has 'difficulties getting to sleep', and so it is not a prominent issue for all people with tinnitus.</li> <li>• Could be covered by 'tinnitus intrusiveness'.</li> </ul> |
| Fear                            | 74 | <i>No strong views expressed.</i>                                                                                                                                                                                                                                               | <i>No strong views expressed.</i>                                                                                                                                                                                                                    |
| Helplessness (lack of control)  | 74 | <i>No strong views expressed.</i>                                                                                                                                                                                                                                               | <i>No strong views expressed.</i>                                                                                                                                                                                                                    |
| Impact on individual activities | 95 | <i>No strong views expressed.</i>                                                                                                                                                                                                                                               | Could be covered by 'tinnitus intrusiveness'.                                                                                                                                                                                                        |
| Impact on relationships         | 74 | <i>No strong views expressed.</i>                                                                                                                                                                                                                                               | Could be covered by 'tinnitus intrusiveness'.                                                                                                                                                                                                        |
| Impact on social life           | 95 | <ul style="list-style-type: none"> <li>• The group acknowledged that tinnitus has a major impact on social activities (e.g. can cause isolation).</li> <li>• One participant felt this was important because one's social life is essential for personal well-being.</li> </ul> | Could be covered by 'tinnitus intrusiveness'.                                                                                                                                                                                                        |
| Impact on work                  | 95 | <i>No strong views expressed.</i>                                                                                                                                                                                                                                               | Could be covered by 'tinnitus intrusiveness'.                                                                                                                                                                                                        |
| Irritable                       | 74 | <i>No strong views expressed.</i>                                                                                                                                                                                                                                               | <i>No strong views expressed.</i>                                                                                                                                                                                                                    |
| Quality of sleep                | 74 | <i>No strong views expressed.</i>                                                                                                                                                                                                                                               | The group noted that not everyone has poor 'quality of sleep', and so it is not a prominent issue for all people with tinnitus.                                                                                                                      |
| Suicidal thoughts               | 74 | <i>No strong views expressed.</i>                                                                                                                                                                                                                                               | <i>No strong views expressed.</i>                                                                                                                                                                                                                    |
| Tinnitus-related thoughts       | 74 | <i>No strong views expressed.</i>                                                                                                                                                                                                                                               | <i>No strong views expressed.</i>                                                                                                                                                                                                                    |
| Worries/concerns                | 74 | <i>No strong views expressed.</i>                                                                                                                                                                                                                                               | <i>No strong views expressed.</i>                                                                                                                                                                                                                    |
